# Supplementary material
Source: Springer Nature journal article supplement (https://www.springermedizin.de/resource/supplementary/12875_2009_402_MOESM1_ESM.pdf/9434536)
Supplement: MOESM1 [file 9434536]

**Search of computerised records** in 4 general medical practices using criteria:  
>50 years old, consulting with hip or knee osteoarthritis in previous 12 months

**Random sample**

400 invited to participate in study by written invitation from their general practitioner

**Recruitment**

120 recruited (30% recruitment rate) sent baseline postal questionnaire

**Remote  
Randomisation**

60 participants sent 'The Hip and  
Knee Book'

60 participants sent the control  
booklet

**One month follow-up**

Postal questionnaire sent one month  
after randomisation

**One month follow-up**

Postal questionnaire sent one month  
after randomisation

**Three months follow-up**

Postal questionnaire sent three  
months after randomisation  
50 returned (if response rate 80%)

**Three months follow-up**

Postal questionnaire sent three  
months after randomisation  
50 returned (if response rate 80%)
